# Supplementary material for: Assessment of Acute Obstetrical Needs and the Potential Utility of Point-Of-Care Ultrasound in the North East Region of Haiti: A Cross-Sectional Study
Source: Ann Glob Health. 2020 Jul 3;86(1):72. doi: 10.5334/aogh.2597 (PMC7333557; doi:10.5334/aogh.2597)
Supplement: Appendix A. — Data Collection Tool. [file agh-86-1-2597-s1.pdf]

## APPENDIX A: Data Collection Tool

1. ID number: \_\_ \_ \_\_ \_

2. Age (years): \_\_ \_

3. Pregnant (circle one):

yes

no

unknown

4. LMP (day/month/year): \_\_ \_ / \_\_ \_ / 20 \_\_ \_

5. Gestation (number of prior Pregnancies): \_\_ \_

6. Number of deliveries: \_\_ \_

7. Reason seeking care (circle one):

Injury

Vaginal  
bleeding

Pelvic/abdominal  
pain

Vaginal  
discharge or  
fluid leakage

Delivery

Other: \_\_\_\_\_

8. Suspected diagnosis – *to be completed during initial evaluation* (circle all that apply):

|                    |        |                 |              |                   |
|--------------------|--------|-----------------|--------------|-------------------|
| Multiple gestation | Breech | Transverse      | Fetal demise | Ectopic pregnancy |
| Single gestation   | Vertex | Placenta previa | Normal labor | Other:            |

9. Would an ultrasound study be performed, if available (circle one)? Yes

No

10. Patient sent to (circle one):

Home

Operating theater/  
cesarean section

Birthing room  
/vaginal delivery

Admitted to ward

Other: \_\_\_\_\_

11. If the patients had a “cesarean section” or “vaginal delivery” what occurred (circle all that apply):

Live birth

Still birth

Single gestation birth

Multiple gestation  
birth

Breech presentation

Vertex presentation

Bleeding  
complications

Maternal death

Other: \_\_\_\_\_
